# Supplementary material for: Synthetic whole-slide image tile generation with gene expression profile-infused deep generative models
Source: PubMed Central journal article supplement — Cell Rep Methods. 2023 Jul 19;3(8):100534. doi: 10.1016/j.crmeth.2023.100534 (PMC10475789; doi:10.1016/j.crmeth.2023.100534), 2023-07-19
Supplement: mmc1.pdf [file mmc1.pdf]

**Cell Reports Methods, Volume 3**

**Supplemental information**

**Synthetic whole-slide image tile**

**generation with gene expression profile-infused**

**deep generative models**

**Francisco Carrillo-Perez, Marija Pizurica, Michael G. Ozawa, Hannes Vogel, Robert B. West, Christina S. Kong, Luis Javier Herrera, Jeanne Shen, and Olivier Gevaert**

## List of Supplemental Figures

Figure S1: Synthetic samples generated by the GAN and the RNA-GAN architecture, related to Figures 3 and 4. Panel A: More examples of brain cortex and lung tissue generation using the GAN architecture. Panel B: More examples of brain cortex and lung tissue generation using the RNA-GAN architecture.

Figure S2: Google Form presented to pathologists, related to Figure 6. Example of one of the samples of the form presented to expert pathologists. Three questions were asked, regarding the tissue of origin, the quality of the morphological structure and the presence of image artifacts.

Figure S3: RMSE obtained by the VAE per tissue, related to Figure 2. Violin plots of the RMSE obtained across tissues for all the samples in the test set, during the  $\beta$ VAE training.

Figure S4. Classification problem between glioblastoma (GBM) and lung adenocarcinoma (LUAD) with and without self-supervised pretraining, related to Figure 4. Panel A: Accuracy and F1-Score obtained across the 5-Fold CV for the model trained from scratch and the model using self-supervised learning weights. Panel B: Confusion matrices for the model trained from scratch and the model using self-supervised learning weights across all the test sets in the stratified 5-Fold CV

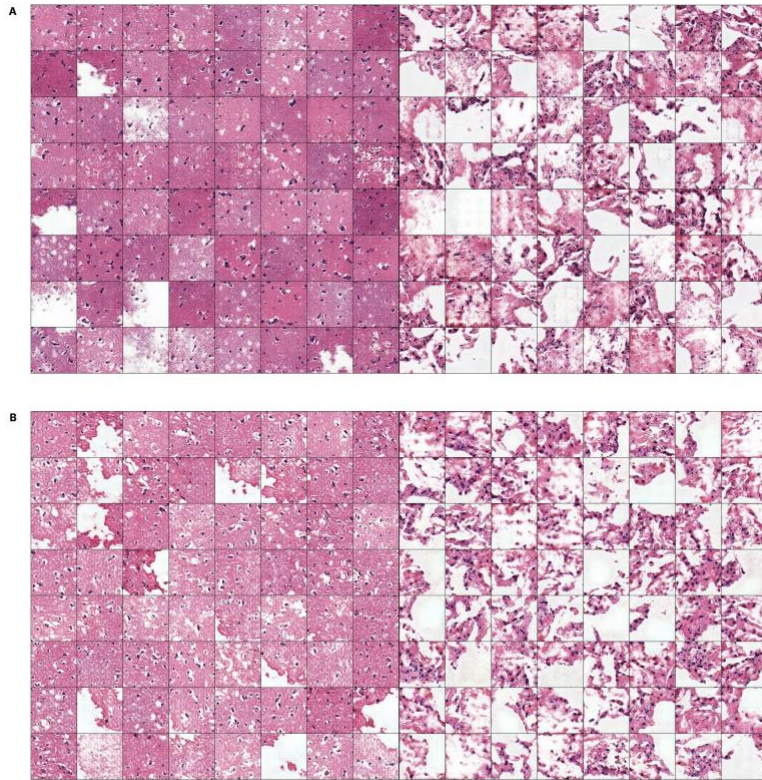

**Figure S1: Synthetic samples generated by the GAN and the RNA-GAN architecture, related to Figures 3 and 4. Panel A:** More examples of brain cortex and lung tissue generation using the GAN architecture. **Panel B:** More examples of brain cortex and lung tissue generation using the RNA-GAN architecture.

Tile 1

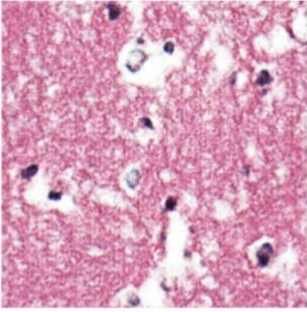

Is it brain or lung tissue? \*

Brain

Lung

Quality of the morphological structures \*

Being 1 very bad and 5 the very good, how would you rate the morphological features present in the tile for an assessment of the tissue?

Very bad      1      2      3      4      5      Very good

          

Do you find artifacts in the image? (e.g. image aberrations) \*

Yes

No

Other: \_\_\_\_\_

**Figure S2: Google Form presented to pathologists, related to Figure 6.** Example of one of the samples of the form presented to expert pathologists. Three questions were asked, regarding the tissue of origin, the quality of the morphological structure and the presence of image artifacts.

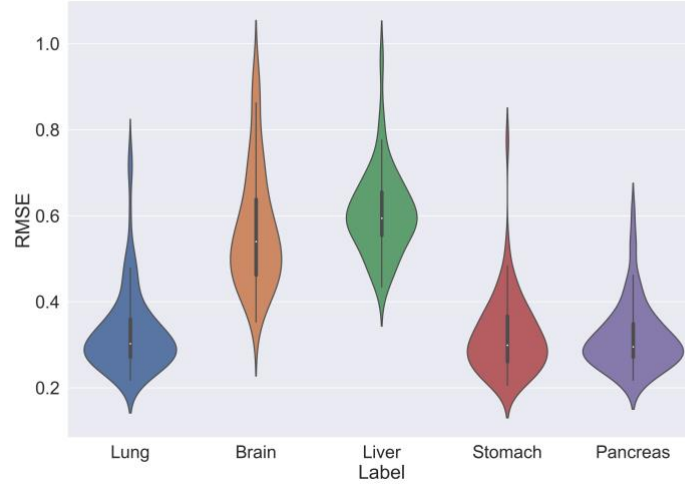

**Figure S3: RMSE obtained by the VAE per tissue, related to Figure 2.** Violin plots of the RMSE obtained across tissues for all the samples in the test set, during the  $\beta$ VAE training.

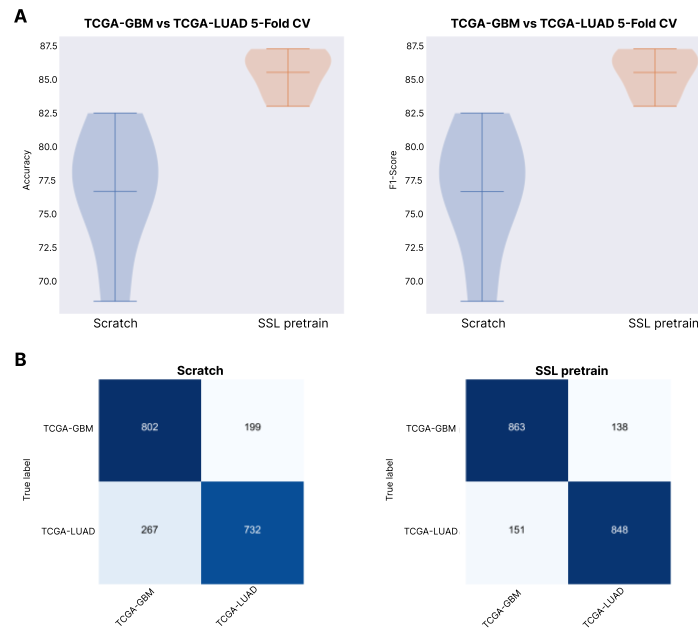

**Figure S4: Classification problem between glioblastoma (GBM) and lung adenocarcinoma (LUAD) with and without self-supervised pretraining, related to Figure 4.** Panel A: Accuracy and F1-Score obtained across the 5-Fold CV for the model trained from scratch and the model using self-supervised learning weights. Panel B: Confusion matrices for the model trained from scratch and the model using self-supervised learning weights across all the test sets in the stratified 5-Fold CV.
